# Supplementary material for: Sequential selection of economic good and action in medial frontal cortex of macaques during value-based decisions
Source: eLife journal article supplement (doi:10.7554/elife.09418), 2015-11-27
Supplement: supp [file elife-09418-supp-v1.zip]

No-choice trial

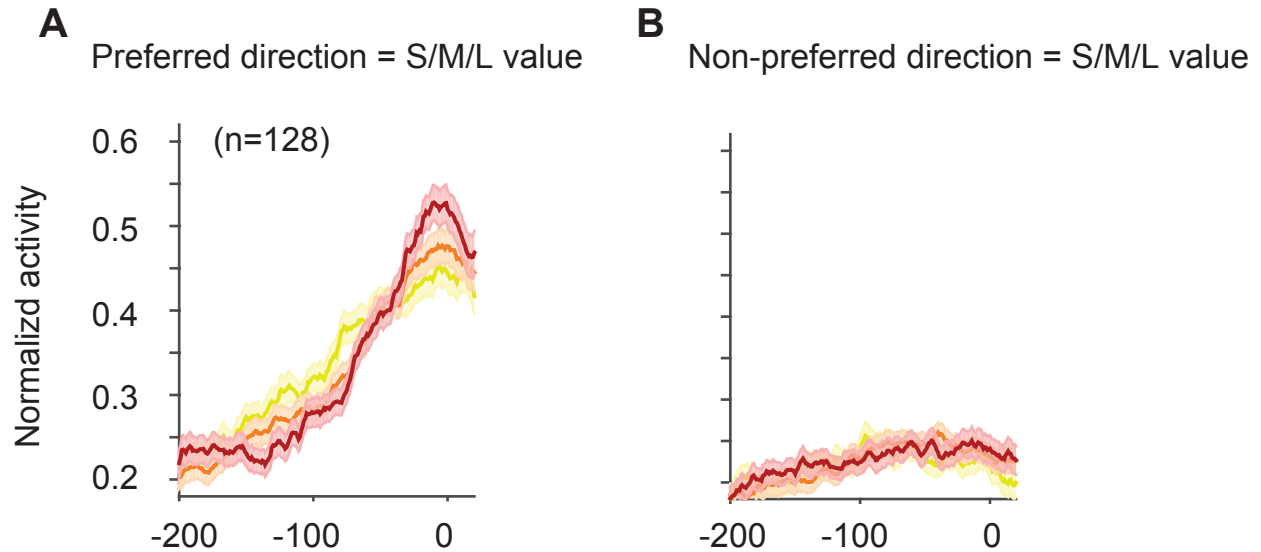

Choice trial

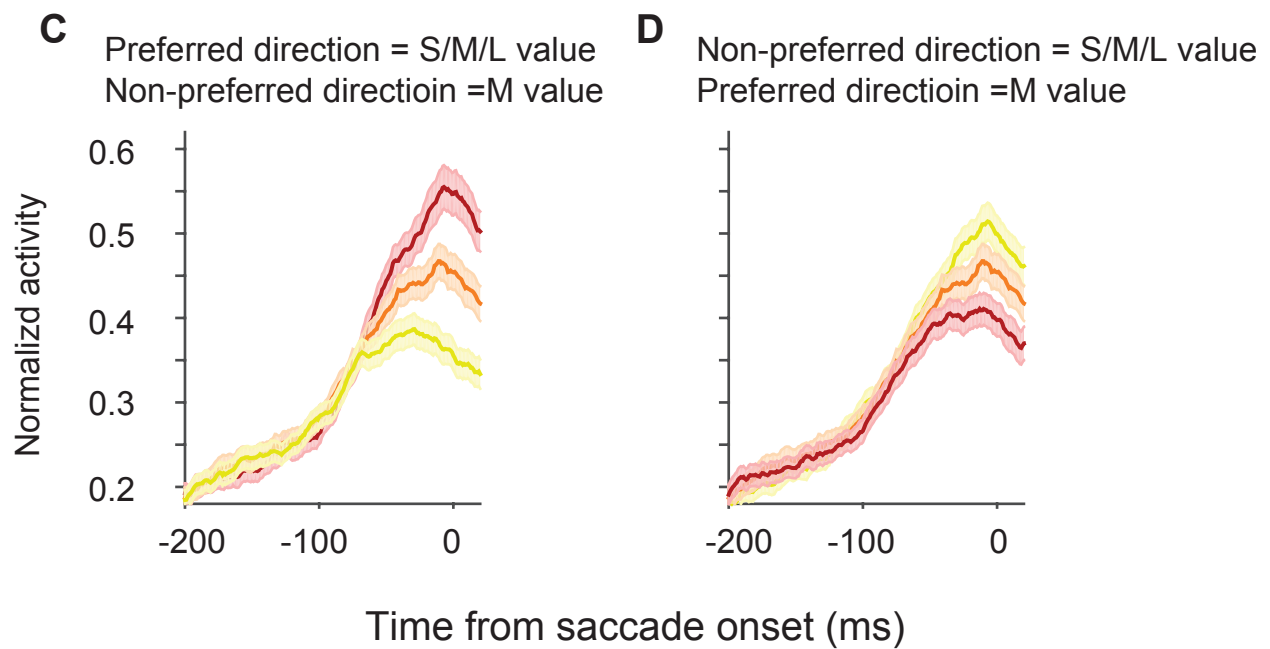

Figure 4 - figure supplement 1. SEF neurons represent the difference in value of targets in the preferred (PD) and non-preferred direction (NPD).
