# Supplementary material for: Sequential selection of economic good and action in medial frontal cortex of macaques during value-based decisions
Source: eLife journal article supplement (doi:10.7554/elife.09418), 2015-11-27
Supplement: supp [file elife-09418-supp-v1.zip]

**A**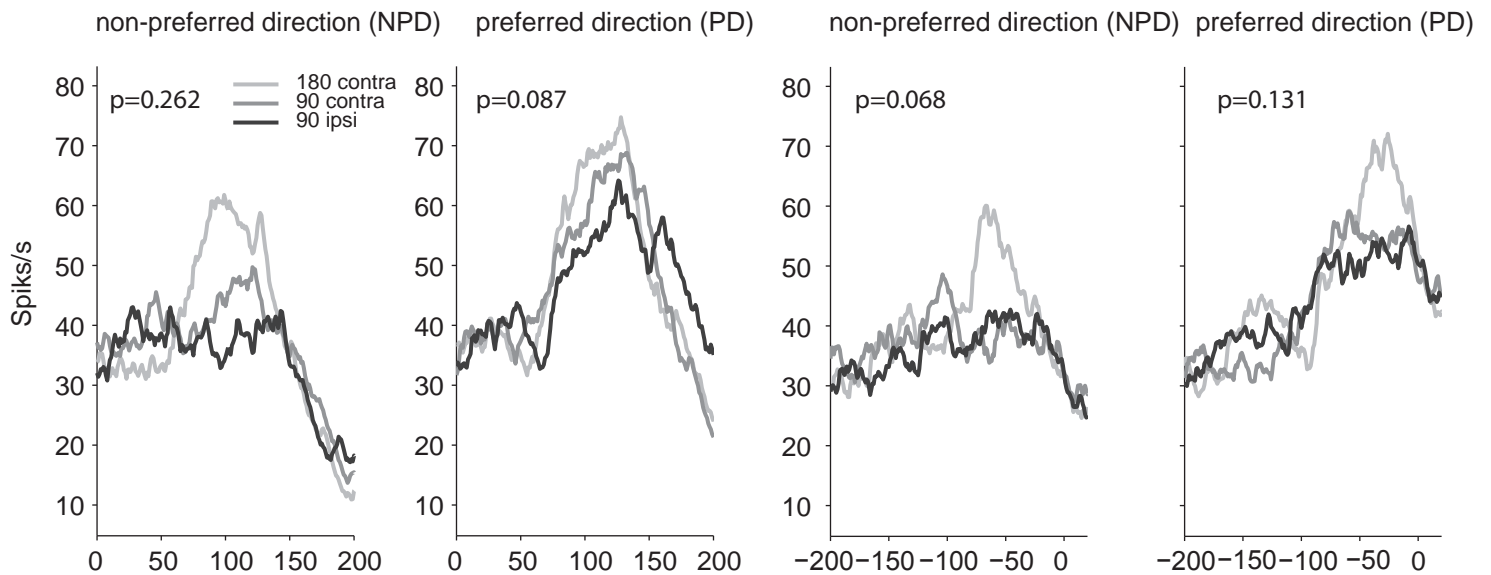**B**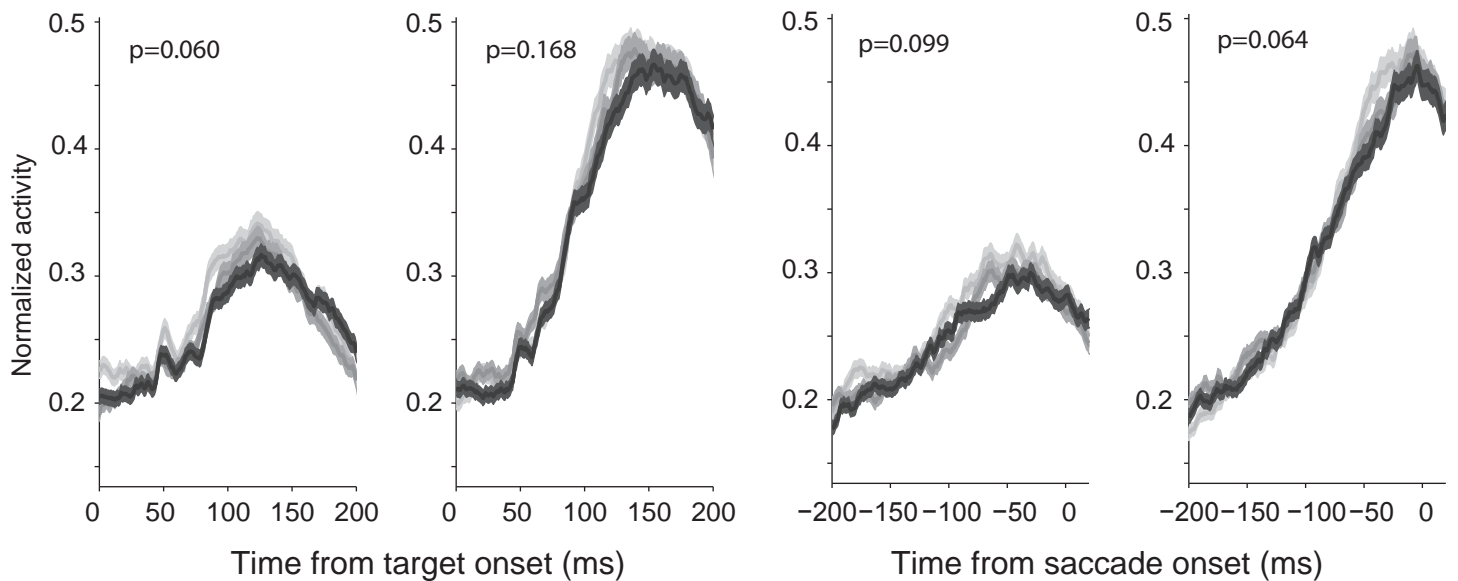

Figure 4 - figure supplement 3: Neural activity modulated by the relative angle and position of the two targets.
