# Supplementary material for: Sequential selection of economic good and action in medial frontal cortex of macaques during value-based decisions
Source: eLife journal article supplement (doi:10.7554/elife.09418), 2015-11-27
Supplement: supp [file elife-09418-supp-v1.zip]

Archive with 8 entries (8 files):
- elife_poa_e09418_Figure_7_figure_supplement_1.pdf
- elife_poa_e09418_Figure_6_figure_supplement_1.pdf
- elife_poa_e09418_Figure_4_figure_supplement_3.pdf
- elife_poa_e09418_Figure_3_figure_supplement_1.pdf
- elife_poa_e09418_Figure_7_figure_supplement_2.pdf
- elife_poa_e09418_Figure_4_figure_supplement_2.pdf
- elife_poa_e09418_Figure_2_figure_supplement_1.pdf
- elife_poa_e09418_Figure_4_figure_supplement_1.pdf
