# Supplementary figures and images for: Sequential selection of economic good and action in medial frontal cortex of macaques during value-based decisions
Source: eLife journal article supplement (doi:10.7554/elife.09418), 2015-11-27

**A**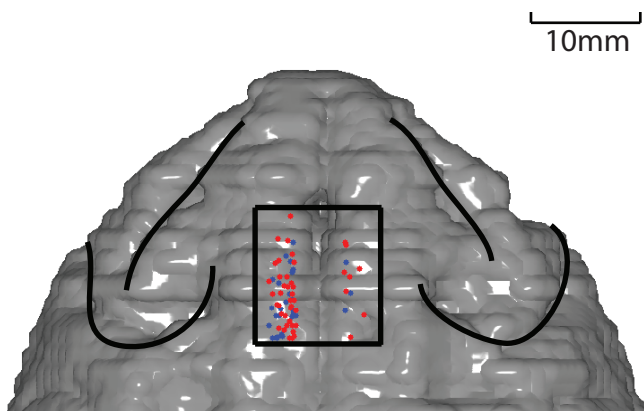**B**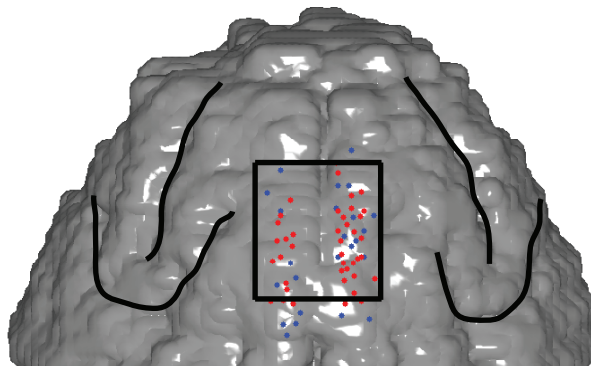

Figure 2- figure supplement 1: Recording locations in SEF.

Supplement: supp [file elife-09418-supp-v1.zip]

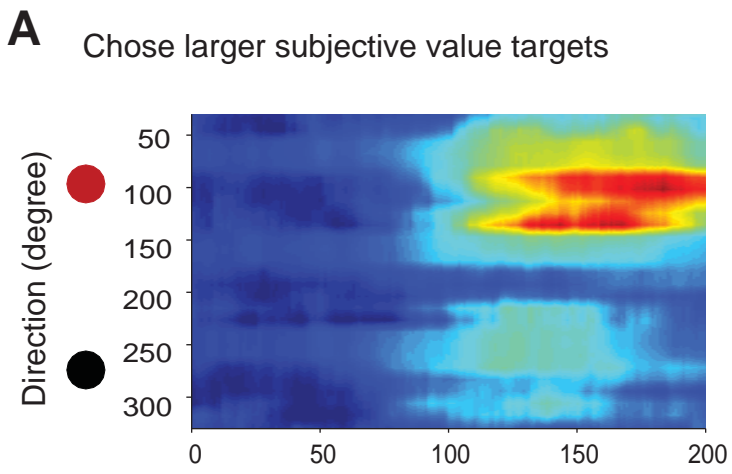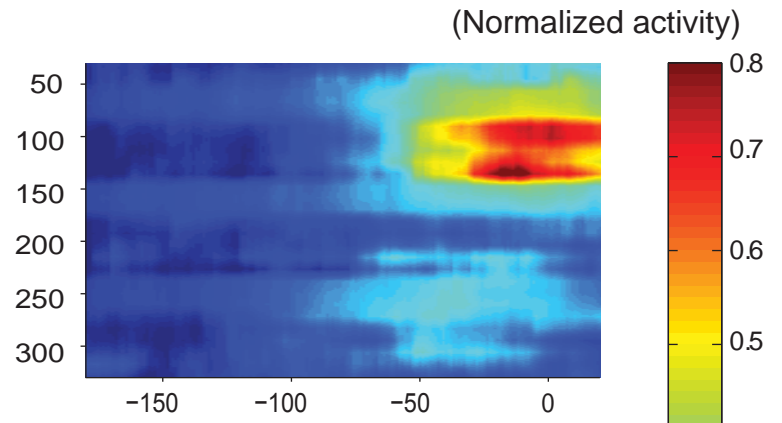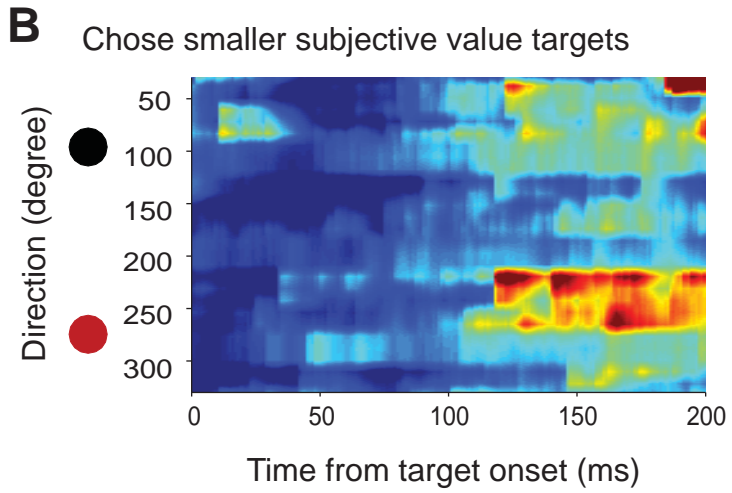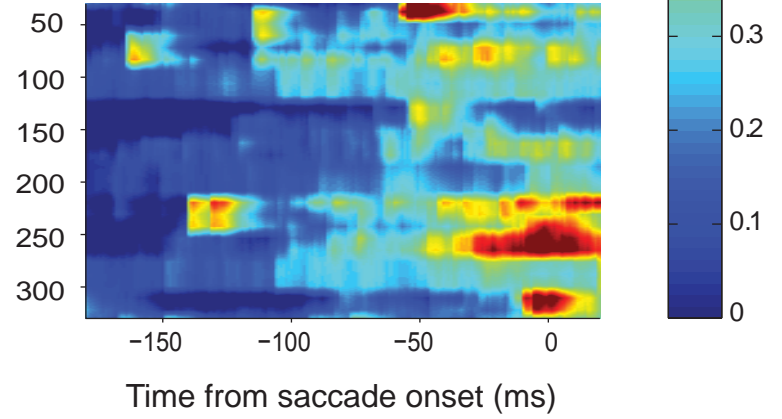

Figure 6 - figure supplement 1: Action value maps for trials with variable choices.

Supplement: supp [file elife-09418-supp-v1.zip › elife_poa_e09418_Figure_6_figure_supplement_1.pdf]
